# Supplementary material for: Association between components of the delirium syndrome and outcomes in hospitalised adults: a systematic review and meta-analysis
Source: BMC Geriatr. 2021 Mar 5;21:162. doi: 10.1186/s12877-021-02095-z (PMC7934253; doi:10.1186/s12877-021-02095-z)
Supplement: Supplementary file 1 — Additional file 1. Databases search strategies. [file 12877_2021_2095_MOESM1_ESM.docx]

**Association between components of the delirium syndrome and outcomes in hospitalised adults: a systematic review and meta-analysis.**

Authors:

Zoë Tieges1,2 zoe.tieges@ed.ac.uk

Terence Quinn3 Terry.Quinn@glasgow.ac.uk

Lorn MacKenzie4 lorn.mackenzie@nhslothian.scot.nhs.uk

Daniel Davis5 daniel.davis@ucl.ac.uk

Graciela Muniz-Terrera6 G.Muniz@ed.ac.uk

Alasdair M. J. MacLullich1 a.maclullich@ed.ac.uk

Susan D. Shenkin1 Susan.Shenkin@ed.ac.uk

1Geriatric Medicine, Edinburgh Delirium Research Group, Usher Institute, University of Edinburgh, Edinburgh, Scotland, UK. 2School of Health and Life Sciences, Glasgow Caledonian University, Glasgow, Scotland, UK. 3Institute of Cardiovascular and Medical Sciences, University of Glasgow, Glasgow, UK. 4Academic and Clinical Central Office for Research & Development, University of Edinburgh, Edinburgh, UK. 5MRC Unit for Lifelong Health and Ageing at University College London, London, UK. 6Centre for Clinical Brain Sciences and Dementia Prevention, University of Edinburgh, Edinburgh, UK.

**Additional file 1. Database Searches**

OVID MEDLINE

1. deliri$.ti,ab.

2. (acute adj2 (confusion$ or "brain syndrome" or "brain failure" or "psycho-organic syndrome" or "organic psychosyndrome")).mp.

3. (terminal$ adj restless$).mp.

4. toxic confus$.mp.

5. delirium/

6. confusion/

7. or/1-6

8. attention.mp.

9. inattention.mp.

10. exp Arousal/

11. exp Psychotic Disorders/

12. Mental Processes/

13. HALLUCINATIONS/

14. Neurobehavioral Manifestations/

15. Behavioral Symptoms/

16. or/8-15

17. 7 and 16

OVID EMBASE

1. deliri$.ti,ab.

2. (acute adj2 (confusion$ or "brain syndrome" or "brain failure" or "psycho-organic syndrome" or "organic psychosyndrome")).mp.

3. (terminal$ adj restless$).mp.

4. toxic confus$.mp.

5. delirium/

6. confusion/ or acute confusion/

7. or/1-6

8. attention.mp.

9. inattention.mp.

10. arousal/

11. exp psychosis/

12. mental function/

13. hallucination/

14. behavior disorder/

15. or/8-14

16. 7 and 15

17. Validat$.mp. or Predict$.ti. or Rule$.mp. or (Predict$ and (Outcome$ or Risk$ or Model$)).mp. or ((History or Variable$ or Criteria or Scor$ or Characteristic$ or Finding$ or Factor$) and (Predict$ or Model$ or Decision$ or Identif$ or Prognos$)).mp. or (Decision$.mp. and ((Model$ or Clinical$).mp. or Statistical Models/)) or (Prognostic and (History or Variable$ or Criteria or Scor$ or Characteristic$ or Finding$ or Factor$ or Model$)).mp.

18. (Stratification or Discrimination or Discriminate or c-statistic or c statistic or Area under the curve or AUC or Calibration or Indices or Algorithm or Multivariable).mp.

19. or/17-18

20. 16 and 19

OVID PsycINFO

1. deliri$.ti,ab.

2. (acute adj2 (confusion$ or "brain syndrome" or "brain failure" or "psycho-organic syndrome" or "organic psychosyndrome")).mp.

3. (terminal$ adj restless$).mp.

4. toxic confus$.mp.

5. DELIRIUM/

6. MENTAL CONFUSION/

7. or/1-6

8. attention.mp.

9. inattention.mp.

10. exp physiological arousal/

11. HALLUCINATIONS/

12. cognitive impairment/

13. behavior problems

14. or/8-13

15. 7 and 14

CINAHL

1. Deliri*

2. Terminal restlessness

3. MH Delirium

4. MH Confusion

5. 1 OR 2 OR 3 OR 4

6. Inattention

7. MH Arousal

8. MH Mental Processes

9. MH Hallucinations

10. MH Neurobehavioral Manifestations

11. MH Behavioral Symptoms

12. 7 OR 8 OR 9 OR 10 OR 11

13. 5 AND 12
