# Supplementary material for: Association between components of the delirium syndrome and outcomes in hospitalised adults: a systematic review and meta-analysis
Source: BMC Geriatr. 2021 Mar 5;21:162. doi: 10.1186/s12877-021-02095-z (PMC7934253; doi:10.1186/s12877-021-02095-z)
Supplement: Supplementary file 2 — Additional file 2. Risk of Bias Assessment tool for Non-randomized Studies (RoBANS) quality assessment criteria. [file 12877_2021_2095_MOESM2_ESM.docx]

**Association between components of the delirium syndrome and outcomes in hospitalised adults: a systematic review and meta-analysis.**

Authors:

Zoë Tieges1,2 zoe.tieges@ed.ac.uk

Terence Quinn3 Terry.Quinn@glasgow.ac.uk

Lorn MacKenzie4 lorn.mackenzie@nhslothian.scot.nhs.uk

Daniel Davis5 daniel.davis@ucl.ac.uk

Graciela Muniz-Terrera6 G.Muniz@ed.ac.uk

Alasdair M. J. MacLullich1 a.maclullich@ed.ac.uk

Susan D. Shenkin1 Susan.Shenkin@ed.ac.uk

1Geriatric Medicine, Edinburgh Delirium Research Group, Usher Institute, University of Edinburgh, Edinburgh, Scotland, UK. 2School of Health and Life Sciences, Glasgow Caledonian University, Glasgow, Scotland, UK. 3Institute of Cardiovascular and Medical Sciences, University of Glasgow, Glasgow, UK. 4Academic and Clinical Central Office for Research & Development, University of Edinburgh, Edinburgh, UK. 5MRC Unit for Lifelong Health and Ageing at University College London, London, UK. 6Centre for Clinical Brain Sciences and Dementia Prevention, University of Edinburgh, Edinburgh, UK.

### **Additional file 2. RoBANS Quality Assessment Criteria**

| **Risk of Bias Item** | **Grading** | **Rationale/Examples** |
| --- | --- | --- |
| **Selection of participants** *(selection bias)* | Low | Sampling frame clearly described with reasonable inclusion/exclusion criteria provided, ideally allowing for inclusion of all participants admitted to the hospital (or specialist service) in whom an assessment of delirium is made using a standardised diagnostic criteria or validated tools. Exclusion of those with delirium tremens or those admitted to the intensive care unit (ICU)/high dependency unit (HDU) or setting that is focused on providing specialist end of life care. |
| High | Exclusions based on availability of data (e.g. admission to ICU/HDU; transfer to nursing/residential care/setting that is focused on providing specialist end of life care), exclusion of those lost to follow-up. |
| Unclear | Sampling frame unclear, criteria for inclusion/exclusion not provided or explained. |
| **Confounding variables** | Low | Multivariate model accounting for likely possible confounding variables. |
| High | No consideration of confounding variables; univariate analyses only. |
| Unclear | Methods for analysis not clearly described or reported. |
| **Measurement of exposure** *(performance bias)* | Low | Clearly described method on how data were collected and extracted. Best practice includes description of who performed data extraction (who performed delirium assessment), case definitions/descriptions of eligible conditions. |
| High | Missing data on key delirium assessment methods. |
| Unclear | Methods for assessing delirium not clearly described. |
| **The blinding of the outcome assessment** | Low | Blinding of outcomes detailed. |
| High | Blinding of outcomes not taken into consideration. |
| Unclear | Not reported in articles. |
| **Incomplete outcome data**  *(attrition bias)* | Low | Outcomes assessed for all included participants. |
| High | Missing outcome assessments. |
| Unclear | Outcome assessment reported as percentages without absolute values being presented, preventing assessment of completeness of outcome reporting. |
| **Selective outcome reporting**  *(reporting bias)* | Low | Reporting as per published protocol. |
| High | Evidence that reporting deviates from publicly accessible protocol/ |
| Unclear | No protocol publicly available. |

RoBANS, Risk of Bias Assessment Tool for Non-Randomised Studies.
